# Supplementary material
Source: PubMed Central journal article supplement (PMC2825055)

## **Supporting Information**

# DNA Release Dynamics from Reducible Polyplexes by AFM

*Lei Wan,<sup>1</sup> Devika S. Manickam,<sup>2</sup> David Oupický,<sup>2</sup> Guangzhao Mao<sup>1,\*</sup>*

*<sup>1</sup> Department of Chemical Engineering and Materials Science and <sup>2</sup> Department of  
Pharmaceutical Sciences, Wayne State University, Detroit, MI 48202*

Corresponding author: [gzmao@eng.wayne.edu](mailto:gzmao@eng.wayne.edu)

**Figure S1.** *In-situ* AFM image sequence of poly(NLS)/DNA polyplex (N/P = 2) disassembly in 0.4 M NaCl solution. 0.02 M DTT was added at time zero. All images are  $2.6 \times 2.6 \mu\text{m}^2$  in scan size and 10 nm in z range.

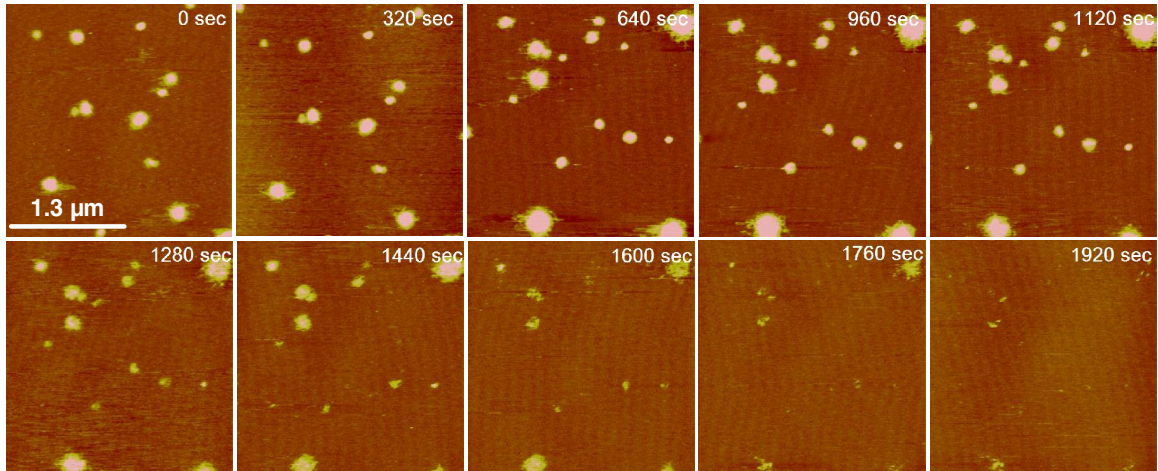

**Figure S2.** *In-situ* AFM image sequence of poly(NLS)/DNA polyplex (N/P = 8) disassembly in 0.4 M NaCl solution. 0.02 M DTT was added at time zero. All images are  $2.6 \times 2.6 \mu\text{m}^2$  in scan size and 12 nm in z range.

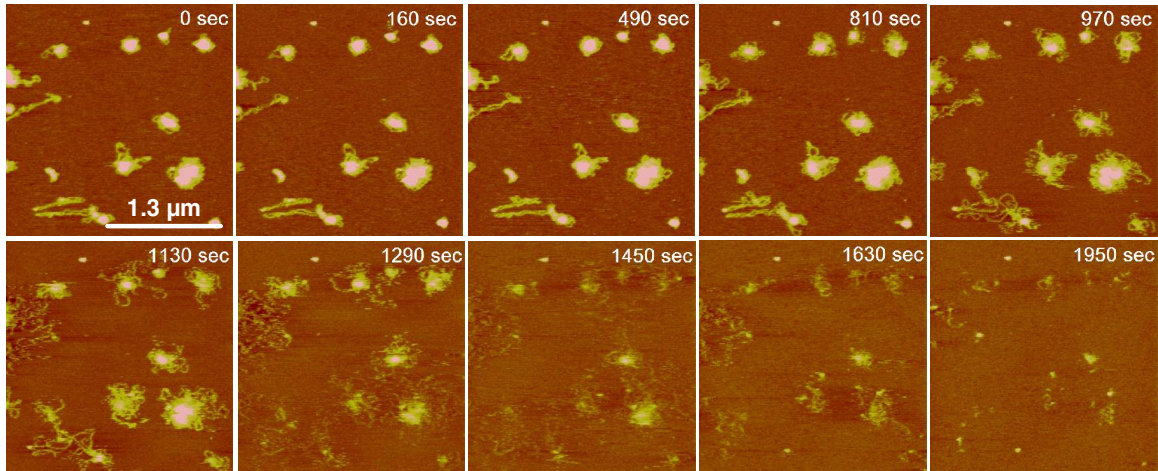

Supplement: NIHMS174301-supplement-1_si_001.pdf [file NIHMS174301-supplement-1_si_001.pdf]
